# Supplementary material
Source: ML conference proceedings conference paper supplement (https://openaccess.thecvf.com/content/ICCV2025/html/Niss_The_Inter-Intra_Modal_ICCV_2025_paper.html)
Supplement: Supplementary file 1 [file Niss_The_Inter-Intra_Modal_ICCV_2025_supplemental.pdf]

# The Inter-Intra Modal Measure: A Predictive Lens on Fine-Tuning Outcomes in Vision-Language Models

## Supplementary Material

### 6. Theorem 1 Proof

#### Proof. Step 1. Representing IIMM as an Expectation

The standard i.i.d. assumption on image embeddings yields  $P_{XX} = P_X \otimes P_X$  and  $Q_{XX} = Q_X \otimes Q_X$ . By definition, we have

$$\text{IIMM}(P) = \frac{1}{2} \left( \underbrace{\mathbb{E}_{(x,y') \sim P_{XY}} [x^\top y']}_{A(P)} + \underbrace{\mathbb{E}_{(x,x') \sim P_{XX}} [x^\top x']}_{B(P)} \right).$$

Similarly, with the perturbation,

$$\text{IIMM}(Q) = \frac{1}{2} \left( \mathbb{E}_{(x,y') \sim Q_{XY}} [x^\top y'] + \mathbb{E}_{(x,x') \sim Q_{XX}} [x^\top x'] \right).$$

#### Step 2. Lipschitz Continuity of the Inner Product

Define the function

$$f(x, y) = x^\top y.$$

For any two pairs  $(x, y)$  and  $(x', y')$  in  $S^{d-1} \times S^{d-1}$ , we have

$$\begin{aligned} |f(x, y) - f(x', y')| &= |x^\top y - x'^\top y'| \\ &\leq |x^\top y - x'^\top y| + |x'^\top y - x'^\top y'| \\ &\leq \|x - x'\|_2 \|y\|_2 + \|x'\|_2 \|y - y'\|_2 \\ &\leq \|x - x'\|_2 + \|y - y'\|_2, \end{aligned}$$

because  $\|x\|_2 = \|y\|_2 = \|x'\|_2 = 1$ . Hence,  $f$  is 1-Lipschitz with respect to the metric

$$d((x, y), (x', y')) = \|x - x'\|_2 + \|y - y'\|_2.$$

#### Step 3. Application of Kantorovich–Rubinstein Duality

By the Kantorovich–Rubinstein duality, for any 1-Lipschitz function  $f$  and any two probability measures  $\mu$  and  $\nu$ , we have

$$\left| \mathbb{E}_{z \sim \mu} [f(z)] - \mathbb{E}_{z \sim \nu} [f(z)] \right| \leq W_1(\mu, \nu).$$

Apply this result to the inter-modal term using  $f(x, y) = x^\top y$ . Thus,

$$\begin{aligned} &\left| \mathbb{E}_{(x,y') \sim Q_{XY}} [x^\top y'] - \mathbb{E}_{(x,y') \sim P_{XY}} [x^\top y'] \right| \\ &\leq W_1(P_{XY}, Q_{XY}) \leq \delta_A. \end{aligned}$$

Similarly, for the intra-modal term, define

$$g(x, x') = x^\top x'.$$

Using the same Lipschitz argument (with the metric  $d((x, x'), (y, y')) = \|x - y\|_2 + \|x' - y'\|_2$ ) we obtain

$$\begin{aligned} &\left| \mathbb{E}_{(x,x') \sim Q_{XX}} [x^\top x'] - \mathbb{E}_{(x,x') \sim P_{XX}} [x^\top x'] \right| \\ &\leq W_1(P_{XX}, Q_{XX}) \leq 2W_1(P_X, Q_X) \leq 2\delta_B. \end{aligned}$$

#### Step 4. Combining the Two Contributions

By the triangle inequality,

$$\begin{aligned} &\left| \text{IIMM}(Q) - \text{IIMM}(P) \right| \\ &= \frac{1}{2} \left| [A(Q) + B(Q)] - [A(P) + B(P)] \right| \\ &\leq \frac{1}{2} \left( |A(Q) - A(P)| + |B(Q) - B(P)| \right) \\ &\leq \frac{1}{2} (\delta_A + 2\delta_B). \end{aligned}$$

#### Step 5. Finite-Sample Concentration

In practice, one estimates the expectations in  $A(P)$  and  $B(P)$  from  $N$  independent samples. Since the inner product  $x^\top y$  is bounded in  $[-1, 1]$ , standard concentration inequalities (e.g., Hoeffding’s inequality) imply that, with probability at least  $1 - \eta$ , the empirical estimates  $\hat{A}(P)$  and  $\hat{B}(P)$  satisfy

$$\left| \hat{A}(P) - A(P) \right| \leq \epsilon_N \quad \text{and} \quad \left| \hat{B}(P) - B(P) \right| \leq \epsilon_N,$$

where

$$\epsilon_N = O\left(\sqrt{\frac{\log(1/\eta)}{N}}\right).$$

Hence, with the corresponding estimates  $\widehat{\text{IIMM}}(P)$  and  $\widehat{\text{IIMM}}(Q)$ , we have

$$\left| \widehat{\text{IIMM}}(Q) - \widehat{\text{IIMM}}(P) \right| \leq \frac{\delta_A + 2\delta_B}{2} + 2\epsilon_N,$$

where the constant 2 in front of  $\epsilon_N$  can be absorbed in the big- $O$  notation.

This completes the proof.  $\square$

### 7. Combining inter- and intra- measures

To determine how best to combine the inter- and intra- measures, we used the Pearson correlation,  $r_p$ , and its 95% CI of the measure determined by different convex combinations of the inter- and intra- measure and the gain over zero-shot error. We see in Table 7 and Table 8 that we do not have

enough power to make strong conclusions about the best coefficient value. We do see a pattern of smaller variance in the correlation estimate when combining the inter- and intra- terms compared to using either term in isolation.

We chose a coefficient of 0.5 for simplicity in further analysis.

## 8. Additional Results

To ensure completeness and reproducibility, Table 5 and Table 6 present the per-task zero-shot accuracy, fine-tuned accuracy, raw accuracy gain, and gain over zero-shot error for each base model and PEFT method, respectively. Kendall’s tau scores, detailed in Table 1 and Table 2 of the main text, were calculated by first computing the transferability measures of interest for each dataset’s zero-shot embeddings. These transferability measures, combined with the per-dataset gains over zero-shot error and raw accuracy gains, form paired observations across datasets. Kendall’s tau was then computed using:

$$\tau = \frac{P - Q}{\sqrt{(P + Q + T)(P + Q + U)}}$$

Here,  $P$  and  $Q$  represent the number of concordant and discordant pairs, respectively. The formula considers all possible pairs of datasets, comparing their relative ordering in each list. Ties are corrected for by  $T$  and  $U$ , which denote the number of tied pairs in the first and second list, respectively.

Table 5. Performance metrics per model and dataset. ZS Acc: Zero-Shot Accuracy, FT Acc: Fine-Tuned Accuracy, Raw Gain: FT Acc - ZS Acc, Gain over ZS: Normalized Gain over Zero-Shot Error.

| Model  | Dataset  | ZS Acc (%) | FT Acc (%) | Raw Gain (%) | Gain over ZS |
|--------|----------|------------|------------|--------------|--------------|
| CLIP   | Cars     | 58.87      | 78.26      | 19.39        | 0.47         |
|        | DTD      | 42.07      | 74.31      | 32.23        | 0.56         |
|        | SVHN     | 27.27      | 96.00      | 68.73        | 0.95         |
|        | EuroSAT  | 44.07      | 97.85      | 53.78        | 0.96         |
|        | CIFAR100 | 61.71      | 85.67      | 23.96        | 0.63         |
|        | GTSRB    | 33.65      | 96.72      | 63.07        | 0.95         |
|        | MNIST    | 50.47      | 99.23      | 48.76        | 0.98         |
|        | RESISC45 | 56.56      | 92.10      | 35.54        | 0.82         |
|        | SUN397   | 61.34      | 75.95      | 14.61        | 0.38         |
|        | STL10    | 97.36      | 98.42      | 1.06         | 0.40         |
| CoCa   | Cars     | 83.85      | 90.10      | 6.26         | 0.39         |
|        | DTD      | 51.91      | 79.26      | 27.34        | 0.57         |
|        | SVHN     | 54.74      | 96.90      | 42.16        | 0.93         |
|        | EuroSAT  | 42.85      | 98.26      | 55.41        | 0.97         |
|        | CIFAR100 | 74.12      | 88.07      | 13.95        | 0.54         |
|        | GTSRB    | 42.39      | 98.30      | 55.91        | 0.97         |
|        | MNIST    | 69.04      | 99.45      | 30.41        | 0.98         |
|        | RESISC45 | 60.13      | 94.60      | 34.48        | 0.86         |
|        | SUN397   | 66.24      | 74.40      | 8.17         | 0.24         |
|        | STL10    | 96.24      | 98.06      | 1.83         | 0.49         |
| EVA-02 | Cars     | 78.80      | 88.55      | 9.75         | 0.46         |
|        | DTD      | 50.96      | 81.22      | 30.27        | 0.62         |
|        | SVHN     | 24.92      | 97.26      | 72.34        | 0.96         |
|        | EuroSAT  | 68.04      | 98.33      | 30.30        | 0.95         |
|        | CIFAR100 | 87.64      | 92.90      | 5.26         | 0.43         |
|        | GTSRB    | 46.64      | 97.78      | 51.14        | 0.96         |
|        | MNIST    | 44.21      | 99.63      | 55.42        | 0.99         |
|        | RESISC45 | 65.57      | 95.22      | 29.65        | 0.86         |
|        | SUN397   | 70.71      | 78.02      | 7.31         | 0.25         |
|        | STL10    | 99.48      | 99.51      | 0.04         | 0.07         |
| SigLIP | Cars     | 90.80      | 94.64      | 3.84         | 0.42         |
|        | DTD      | 62.61      | 84.63      | 22.02        | 0.59         |
|        | SVHN     | 55.87      | 96.95      | 41.07        | 0.93         |
|        | EuroSAT  | 43.63      | 98.63      | 55.00        | 0.98         |
|        | CIFAR100 | 70.91      | 90.28      | 19.37        | 0.67         |
|        | GTSRB    | 52.84      | 98.85      | 46.01        | 0.98         |
|        | MNIST    | 83.52      | 99.62      | 16.10        | 0.98         |
|        | RESISC45 | 60.56      | 95.89      | 35.33        | 0.90         |
|        | SUN397   | 70.23      | 79.31      | 9.08         | 0.31         |
|        | STL10    | 98.19      | 99.18      | 0.99         | 0.54         |

Table 6. Performance metrics per PEFT method and dataset. ZS Acc: Zero-Shot Accuracy, FT Acc: Fine-Tuned Accuracy, Raw Gain: FT Acc - ZS Acc, Gain over ZS: Normalized Gain over Zero-Shot Error.

| Model                   | Dataset  | ZS Acc (%) | FT Acc (%) | Raw Gain (%) | Gain over ZS |
|-------------------------|----------|------------|------------|--------------|--------------|
| Attention-Weight Tuning | Cars     | 58.87      | 81.26      | 22.39        | 0.54         |
|                         | DTD      | 42.07      | 80.16      | 38.09        | 0.66         |
|                         | SVHN     | 27.27      | 96.57      | 69.29        | 0.95         |
|                         | EuroSAT  | 44.07      | 98.52      | 54.44        | 0.97         |
|                         | CIFAR100 | 61.71      | 88.16      | 26.45        | 0.69         |
|                         | GTSRB    | 33.65      | 98.15      | 64.50        | 0.97         |
|                         | MNIST    | 50.47      | 99.56      | 49.09        | 0.99         |
|                         | RESISC45 | 56.56      | 94.62      | 38.06        | 0.88         |
|                         | SUN397   | 61.34      | 76.31      | 14.97        | 0.39         |
|                         | STL10    | 97.36      | 98.44      | 1.08         | 0.41         |
| BitFit                  | Cars     | 58.87      | 74.16      | 15.28        | 0.37         |
|                         | DTD      | 42.07      | 70.43      | 28.35        | 0.49         |
|                         | SVHN     | 27.27      | 95.15      | 67.88        | 0.93         |
|                         | EuroSAT  | 44.07      | 98.04      | 53.96        | 0.96         |
|                         | CIFAR100 | 61.71      | 83.90      | 22.19        | 0.58         |
|                         | GTSRB    | 33.65      | 95.30      | 61.65        | 0.93         |
|                         | MNIST    | 50.47      | 99.15      | 48.68        | 0.98         |
|                         | RESISC45 | 56.56      | 90.37      | 33.81        | 0.78         |
|                         | SUN397   | 61.34      | 73.68      | 12.34        | 0.32         |
|                         | STL10    | 97.36      | 98.31      | 0.95         | 0.36         |
| LoRA                    | Cars     | 58.87      | 68.23      | 9.35         | 0.23         |
|                         | DTD      | 42.07      | 65.90      | 23.83        | 0.41         |
|                         | SVHN     | 27.27      | 80.34      | 53.07        | 0.73         |
|                         | EuroSAT  | 44.07      | 94.63      | 50.56        | 0.90         |
|                         | CIFAR100 | 61.71      | 80.49      | 18.78        | 0.49         |
|                         | GTSRB    | 33.65      | 91.39      | 57.74        | 0.87         |
|                         | MNIST    | 50.47      | 97.89      | 47.42        | 0.96         |
|                         | RESISC45 | 56.56      | 85.87      | 29.32        | 0.67         |
|                         | SUN397   | 61.34      | 67.99      | 6.65         | 0.17         |
|                         | STL10    | 97.36      | 95.03      | -2.34        | -0.89        |
| CLIP-Adapter            | Cars     | 58.87      | 62.45      | 3.58         | 0.09         |
|                         | DTD      | 42.07      | 48.24      | 6.17         | 0.11         |
|                         | SVHN     | 27.27      | 49.30      | 22.03        | 0.30         |
|                         | EuroSAT  | 44.07      | 88.52      | 44.44        | 0.79         |
|                         | CIFAR100 | 61.71      | 72.13      | 10.42        | 0.27         |
|                         | GTSRB    | 33.65      | 67.32      | 33.67        | 0.51         |
|                         | MNIST    | 50.47      | 94.26      | 43.79        | 0.88         |
|                         | RESISC45 | 56.56      | 80.21      | 23.65        | 0.54         |
|                         | SUN397   | 61.34      | 67.46      | 6.12         | 0.16         |
|                         | STL10    | 97.36      | 95.03      | -2.34        | -0.89        |

Table 7. Pearson correlation and 95% confidence intervals of zero-shot measure and gain over zero-shot error for different values of  $\alpha$  in convex combinations of the inter and intra measures,  $\alpha \text{intra} + (1 - \alpha) \text{inter}$ . Data from four base models trained over 9 tasks.

| Model    | CLIP  |              | CoCa  |              | EVA-02 |              | SigLIP |              |
|----------|-------|--------------|-------|--------------|--------|--------------|--------|--------------|
| $\alpha$ | $r_p$ | 95% CI       | $r_p$ | 95% CI       | $r_p$  | 95% CI       | $r_p$  | 95% CI       |
| 0.00     | 0.79  | (0.26, 0.95) | 0.91  | (0.62, 0.98) | 0.85   | (0.43, 0.97) | 0.89   | (0.55, 0.98) |
| 0.10     | 0.92  | (0.66, 0.98) | 0.95  | (0.77, 0.99) | 0.91   | (0.62, 0.98) | 0.94   | (0.73, 0.99) |
| 0.20     | 0.97  | (0.86, 0.99) | 0.96  | (0.82, 0.99) | 0.94   | (0.73, 0.99) | 0.96   | (0.82, 0.99) |
| 0.30     | 0.98  | (0.9, 1.0)   | 0.97  | (0.86, 0.99) | 0.95   | (0.77, 0.99) | 0.97   | (0.86, 0.99) |
| 0.40     | 0.97  | (0.86, 0.99) | 0.97  | (0.86, 0.99) | 0.95   | (0.77, 0.99) | 0.96   | (0.82, 0.99) |
| 0.50     | 0.96  | (0.82, 0.99) | 0.96  | (0.82, 0.99) | 0.95   | (0.77, 0.99) | 0.96   | (0.82, 0.99) |
| 0.60     | 0.95  | (0.77, 0.99) | 0.96  | (0.82, 0.99) | 0.94   | (0.73, 0.99) | 0.96   | (0.82, 0.99) |
| 0.70     | 0.93  | (0.7, 0.99)  | 0.95  | (0.77, 0.99) | 0.94   | (0.73, 0.99) | 0.95   | (0.77, 0.99) |
| 0.80     | 0.92  | (0.66, 0.98) | 0.95  | (0.77, 0.99) | 0.93   | (0.7, 0.99)  | 0.95   | (0.77, 0.99) |
| 0.90     | 0.91  | (0.62, 0.98) | 0.94  | (0.73, 0.99) | 0.93   | (0.7, 0.99)  | 0.94   | (0.73, 0.99) |
| 1.00     | 0.90  | (0.59, 0.98) | 0.94  | (0.73, 0.99) | 0.93   | (0.7, 0.99)  | 0.94   | (0.73, 0.99) |

Table 8. Pearson correlation and 95% confidence intervals of zero-shot measure and gain over zero-shot error for different values of  $\alpha$  in convex combinations of the inter and intra measures,  $\alpha \text{intra} + (1 - \alpha) \text{inter}$ . Data from PEFT methods trained over 9 tasks.

| Method   | Attention-WT |              | BitFit |              | LoRA  |              | Adapter |               |
|----------|--------------|--------------|--------|--------------|-------|--------------|---------|---------------|
| $\alpha$ | $r_p$        | 95% CI       | $r_p$  | 95% CI       | $r_p$ | 95% CI       | $r_p$   | 95% CI        |
| 0.00     | 0.81         | (0.32, 0.96) | 0.78   | (0.24, 0.95) | 0.80  | (0.29, 0.96) | 0.61    | (-0.09, 0.91) |
| 0.10     | 0.93         | (0.7, 0.99)  | 0.92   | (0.66, 0.98) | 0.92  | (0.66, 0.98) | 0.72    | (0.11, 0.94)  |
| 0.20     | 0.98         | (0.9, 1.0)   | 0.97   | (0.86, 0.99) | 0.97  | (0.86, 0.99) | 0.76    | (0.19, 0.95)  |
| 0.30     | 0.98         | (0.9, 1.0)   | 0.98   | (0.9, 1.0)   | 0.98  | (0.9, 1.0)   | 0.77    | (0.22, 0.95)  |
| 0.40     | 0.97         | (0.86, 0.99) | 0.97   | (0.86, 0.99) | 0.97  | (0.86, 0.99) | 0.77    | (0.22, 0.95)  |
| 0.50     | 0.96         | (0.82, 0.99) | 0.96   | (0.82, 0.99) | 0.95  | (0.77, 0.99) | 0.76    | (0.19, 0.95)  |
| 0.60     | 0.94         | (0.73, 0.99) | 0.94   | (0.73, 0.99) | 0.94  | (0.73, 0.99) | 0.75    | (0.17, 0.94)  |
| 0.70     | 0.93         | (0.7, 0.99)  | 0.93   | (0.7, 0.99)  | 0.93  | (0.7, 0.99)  | 0.74    | (0.15, 0.94)  |
| 0.80     | 0.92         | (0.66, 0.98) | 0.92   | (0.66, 0.98) | 0.91  | (0.62, 0.98) | 0.73    | (0.13, 0.94)  |
| 0.90     | 0.90         | (0.59, 0.98) | 0.91   | (0.62, 0.98) | 0.90  | (0.59, 0.98) | 0.73    | (0.13, 0.94)  |
| 1.00     | 0.89         | (0.55, 0.98) | 0.90   | (0.59, 0.98) | 0.89  | (0.55, 0.98) | 0.72    | (0.11, 0.94)  |

Table 9. Linear fit of IIMM with different intra-modal measures to gain over zero-shot error following fine-tuning by pre-trained model ( $\alpha = 0.5$ ).<sup>\*</sup>

| Model                        | CoCa                             |             | EVA-02                           |             | CLIP         |             | SigLIP       |             |
|------------------------------|----------------------------------|-------------|----------------------------------|-------------|--------------|-------------|--------------|-------------|
| Intra-Modal Measure          | p-value                          | $r_s$       | p-value                          | $r_s$       | p-value      | $r_s$       | p-value      | $r_s$       |
| <b>Intra-Images Distance</b> | <b><math>&lt; 10^{-3}</math></b> | <b>0.95</b> | <b><math>&lt; 10^{-3}</math></b> | <b>0.93</b> | <b>0.001</b> | <b>0.91</b> | <b>0.002</b> | <b>0.88</b> |
| H-Score                      | 0.020                            | 0.75        | 0.077                            | 0.62        | 0.002        | 0.88        | 0.020        | 0.75        |
| TransRate                    | 0.004                            | 0.85        | 0.007                            | 0.82        | 0.005        | 0.83        | 0.004        | 0.85        |
| GBC                          | 0.002                            | 0.88        | 0.050                            | 0.67        | 0.042        | 0.68        | 0.016        | 0.77        |
